# Supplementary material for: WFS1 protein expression correlates with clinical progression of optic atrophy in patients with Wolfram syndrome
Source: PubMed Central journal article supplement (PMC8685651; doi:10.1136/jmedgenet-2020-107257), 2021-05-18
Supplement: jmedgenet-2020-107257supp001.pdf [file jmedgenet-2020-107257supp001.pdf]

## APPENDIX: SUPPLEMENTARY TABLE AND FIGURE

**SUPPLEMENTARY TABLE:** Median with upper and lower values of baseline characteristics between partial and deficient WFS1 group. Data expressed in graphical form in Figure 3 and Supplementary Figure.

|                                             | WFS expression group |                    | Significance |
|---------------------------------------------|----------------------|--------------------|--------------|
|                                             | Partial (n=2)        | Deficient (n=6)    |              |
| Median (lower, upper) onset of DM (years)   | 3.8 (1.5, 6.0)       | 5.5 (3.0, 10.0)    | 0.50         |
| Median (lower, upper) HbA1C (mmol/mol)      | 72.1 (65.2, 79.0)    | 63.4 (55.2, 79.8)  | 0.32         |
| Median onset of OA (years)                  | 11.0 (8.0, 14.0)     | 5.5 (4.0, 9.0)     | 0.13         |
| Median current LogMAR value                 | 0.3 (0.2, 0.4)       | 2.0 (1.6, 2.9)     | 0.04         |
| Median onset of hearing loss (years)        | 7.8 (1.5, 14.0)      | 8.5 (4.0, 13.0)    | 1.00         |
| Median hearing threshold (dB)               | 65.0 (50, 80)        | 77.5 (35.0, 100.0) | 0.64         |
| Median onset of urinary dysfunction (years) | 13.0 (13.0)          | 10.5 (3.0, 16.0)   | 1.00         |
| Median onset of DI (years)                  | 14.5 (14.0, 15.0)    | 16.0 (10.0, 16.0)  | 0.33         |

**SUPPLEMENTARY FIGURE: Relation of phenotype with WFS1 protein expression**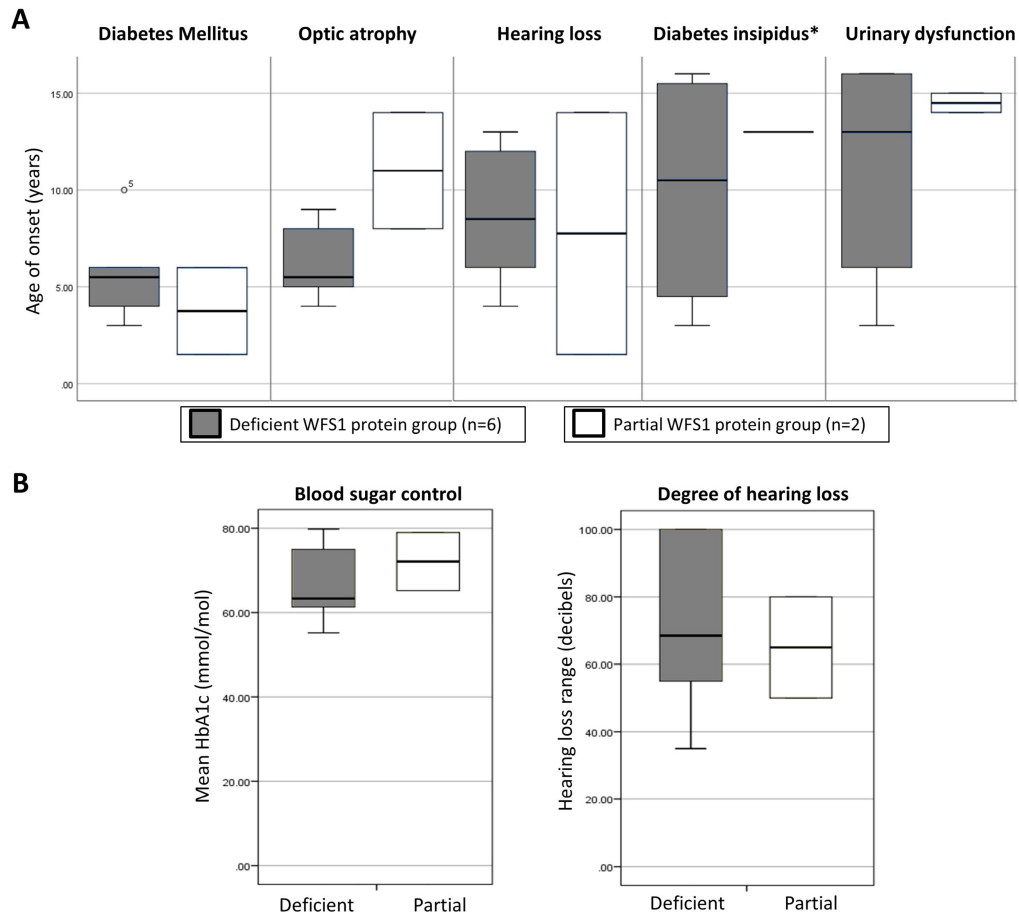

**(A)** Box plots comparing the age of onset for Diabetes mellitus, optic atrophy, hearing loss, diabetes insipidus and urinary dysfunction, between deficient and partial WFS1 protein groups.  $p > 0.05$  between deficient and partial WFS1 protein groups. \* 2 patients in deficient group not developed DI, 1 patient in the partial WFS1 group not developed DI.

**(B)** Box plot comparing HbA1c and hearing loss threshold between deficient and partial WFS1 protein groups.  $P > 0.05$ .
